1 **Characterization and Resistance to Mutation of a Single-Channel Multiplex PCR Assay for SARS-CoV-2**

2

3 Amy L. Pednault<sup>1</sup> and Brian M. Swalla<sup>2</sup>

4

5 <sup>1</sup>IDEXX Laboratories, Inc., 1 IDEXX Drive, Westbrook, Maine 04092. Phone: 207-556-6102. Email: amy-  
6 pednault@idexx.com

7

8 <sup>2</sup>IDEXX Laboratories, Inc., 1 IDEXX Drive, Westbrook, Maine 04092. Phone: 207-556-3411. Email: brian-  
9 swalla@idexx.com

10

11 Abstract

12 Throughout the COVID-19 pandemic, wastewater surveillance has been used worldwide to provide valuable  
13 public health data. RT-qPCR is frequently used as a quantitative methodology for wastewater surveillance but is  
14 susceptible to mutations in target regions. These mutations may lead to misinterpretation of surveillance data; a  
15 drop in signal could be concluded to be a result of lower viral load, when in fact it is caused by reduced  
16 detection efficiency. We describe a novel approach to mitigating the impacts of such mutations: monitoring the  
17 cumulative signal from two targets (N1 and N2) via independent amplification reactions using identically labeled  
18 probes; a “single-channel multiplex” approach. Using the IDEXX Water SARS-CoV-2 RT-qPCR test, we  
19 demonstrate equivalent intra-assay repeatability and quantitative results from the combined N1N2 test when  
20 compared to individual N1 and N2 assays. Furthermore, we show that while mutations in B.1.1.529, BA.5.2, and  
21 BA.5.2.1 significantly impact the performance of the N1 assay, the impact on the N1N2 assay was negligible, and  
22 nearly within acceptable margin of error for technical replicates. These findings demonstrate that a single-  
23 channel multiplex approach can be used to improve the robustness of wastewater surveillance and minimize the  
24 risk of future mutations leading to unreliable public health data.

25

## 26 Introduction

27 Wastewater surveillance for severe acute respiratory syndrome coronavirus 2 (SARS-CoV-2) has provided  
28 valuable information to public health officials during the COVID-19 pandemic (Hopkins et al., 2023; Kirby et al.,  
29 2021), with programs implemented around the world (Agrawal et al., 2021; Arora et al., 2020; Prado et al.,  
30 2021). Notable examples include the National Wastewater Surveillance System (Kirby et al., 2021), as well as  
31 several national systems resulting from a European Commission recommendation issued in October of 2021  
32 (European Commission, 2021). Surveillance has shown that trends in community infection dynamics correlate  
33 with trends in viral copies of SARS-CoV-2 in wastewater (Peccia et al., 2020). Wastewater surveillance can  
34 therefore provide valuable, independent information on infection trends via a single, non-invasive sampling  
35 event representing an entire community.

36

37 Quantitative reverse-transcription polymerase chain reaction (RT-qPCR) is commonly used for wastewater  
38 surveillance (Aw & Rose, 2012; Farkas et al., 2020). To be reliable, RT-qPCR requires appropriately designed  
39 primers and probe(s) that provide specific amplification and detection. When the target region displays  
40 sequence heterogeneity, additional design considerations are required to ensure all relevant sequences are  
41 detected. Various mutations in SARS-CoV-2 have emerged during the pandemic, and occasionally these  
42 mutations have impacted the target annealing regions for RT-qPCR tests.

43

44 The existence of an emerging mutation affecting a RT-qPCR test may go unrecognized until sequence data has  
45 been collected and analyzed. Additional time may be required to understand whether a new mutation is  
46 growing in prevalence and associated as a characteristic feature in a significant new variant. This delay, coupled  
47 with the need for prompt interpretation and response to wastewater surveillance trending data, creates a time  
48 during which responsive actions are taken before the significance of a new mutation is understood. This could  
49 lead to misinterpretation of recent trends; for example, it may be concluded that an apparent drop in viral

50 detection indicates lower viral load in the wastewater, when in fact the lower viral measurements were caused  
51 by reduced RT-qPCR detection efficacy.

52

53 To mitigate this risk, it is important to implement primary surveillance methods for trending of SARS-CoV-2 in  
54 wastewater that are robust to the impacts of mutation. One widely used approach is to monitor multiple regions  
55 within the target genome. This approach provided the first evidence of an emerging mutation in the B.1.1.529  
56 variant where failure of a specific PCR design targeting the S gene occurred while detection of other targets  
57 continued unaffected (Kidd et al., 2021). Although monitoring of multiple targets can be effective, there are  
58 limitations to this approach. First, the impact of a mutation on RT-qPCR can vary dramatically. For example, a  
59 deletion is more likely to cause a severe and observable assay defect compared to a single nucleotide  
60 substitution that may have little or no effect. Second, mutations with modest effects may remain undetected  
61 due to larger sources of variation in upstream sample handling and processing steps. Third, due to the increased  
62 complexity and variance of monitoring multiple targets, it can be challenging to determine when the  
63 convergence or divergence in results between targets may respectively indicate the absence or presence of a  
64 significant mutation. Monitoring multiple regions within the target genome, therefore, can cause lower  
65 confidence in results when a new variant is becoming more prevalent, but before adequate sequencing is  
66 performed. Finally, conducting multiple assays adds time, cost, and complexity to the laboratory workflow.

67

68 A different approach has been described in which detection of highly variable targets was improved by using  
69 identically labelled hydrolysis probes with a single primer pair (Nagy et al., 2017; Yip et al., 2005). The Water  
70 SARS-CoV-2 RT-PCR Test (IDEXX Laboratories, Inc.) builds on this concept by integrating two independent  
71 amplification reactions and their respective, identically labelled probes into a “single-channel multiplex” assay.  
72 The test uses primer and probe sequences from the U.S. CDC for detection of N1 and N2 (Lu et al., 2020). The  
73 output of the test is a cumulative signal from amplification and detection of both N1 and N2 target regions and  
74 the test does not quantify each target individually.

75

76 The Water SARS-CoV-2 RT-PCR Test has been used successfully for quantitative wastewater surveillance since  
77 the beginning of the pandemic (Brooks et al., 2021, 2023; Galani et al., 2022; Hopkins et al., 2023). This design  
78 has also been effective for clinical testing using a related product with EUA approval (Mascuch et al., 2020;  
79 United States Food and Drug Administration, 2020). In this report, the single-channel multiplex design used in  
80 the Water SARS-CoV-2 RT-PCR Test was examined and found to be resistant to mutations while retaining similar  
81 precision, accuracy, and reliability to the individual N1 and N2 reactions described by CDC.

82

### 83 Materials & Methods

84 RT-qPCR was performed using the Water SARS-CoV-2 RT-PCR Test (IDEXX laboratories, Inc., 99-0015314)  
85 according to the manufacturer's instructions. The kit provides reverse transcriptase, DNA polymerase, and a  
86 reaction buffer with all necessary components in a premixed, ready-to-use format. Reactions were assembled by  
87 combining 10  $\mu$ L of RNA Master Mix, 10  $\mu$ L of a primer and probe mixture (see below), and 5  $\mu$ L of nucleic-acid  
88 template in a 96-well plate (Thermo Fisher Scientific, 4346906 or AB0800). Plates were sealed with film (Thermo  
89 Fisher Scientific, 4360954 or AB1170), centrifuged briefly at low speed to settle the contents and incubated in  
90 either a QuantStudio 5 (Applied Biosystems) or an AriaMx (Agilent) PCR system using the following  
91 thermocycling program: 15 min at 50°C for reverse transcription, 1 min at 95°C for denaturation and enzyme  
92 activation, followed by 45 cycles of amplification using 15 s at 95°C and 30 s at 60°C. This cycling program is  
93 standardized across different RT-qPCR tests developed by IDEXX and differs from the conditions often used for  
94 N1 and N2 amplification primarily by using a higher extension temperature (60°C). Reaction signal was detected  
95 on the FAM channel relative to a passive reference dye (ROX) included in the reaction mix and results were  
96 analyzed using the software provided by the respective manufacturer. One or more no-template controls  
97 (molecular grade water) and positive template controls (SARS-CoV-2 "PC" synthetic template; IDEXX  
98 laboratories, Inc.,) were included on each PCR plate. Quantification cycle ( $C_q$ ) results were obtained for each  
99 reaction after setting the threshold fluorescence manually at a level above background where all amplification

100 reactions were exponential when viewed on a logarithmic plot. Within each PCR system, threshold fluorescence  
101 levels were set consistently across experiments. The data shown in Figures 1 and 2 and Tables 3, 4, and 5 were  
102 produced with the QuantStudio 5 system using a threshold value of 0.1. The data shown in Figure 3 and Table 6  
103 was produced with the AriaMx system using a threshold value of 0.02.

104

#### 105 *Primers and probes*

106 Custom derivatives of the primer and probe mixture contained in the Water SARS-CoV-2 RT-PCR Test were used  
107 in this study. The kit provides a ready-to-use mixture of the primers and probes described by the US CDC for  
108 detection of N1, N2, and Human RNaseP (Lu et al., 2020). To perform the full reaction as used in the IDEXX  
109 Water SARS-CoV-2 RT-PCR Test, primers and probes for all three reactions (N1, N2, and Internal Control) were  
110 combined in a single mixture (N1N2 Mix) at final concentrations similar to the recommendations from Lu et al.  
111 Custom reactions were also prepared excluding either the N2 reaction (N1 Mix) or N1 reaction (N2 Mix). A  
112 summary of the different primer and probe combinations used in this study is provided in Table 1. Probes for  
113 both N1 and N2 were identically labelled at the 5' end with 6-carboxy-fluorescein (FAM) and at the 3' end with  
114 Black Hole Quencher 1. All primers and probes were prepared and diluted in 10 mM Tris-HCl pH 8.0 with 0.1  
115 mM EDTA (low EDTA TE Buffer, Sigma T2694 or Invitrogen 12090-015) supplemented with approximately 0.05  
116 mg/mL Poly A (Sigma 10108626001). The statistical significance of differences in variance between each  
117 combination of primers and probes was evaluated with Levene's and Bartlett's tests. Statistical analyses were  
118 conducted using JMP software (JMP Statistical Discovery).

119

#### 120 *Template*

121 RNA template was prepared from a commercial product (Quantitative Synthetic SARS-CoV-2 RNA; ATCC VR-  
122 3276SD). Based on the initial concentration provided by the manufacturer, dilutions were prepared in TE buffer  
123 with Poly A to provide 100, 1,000, or 10,000 copies per reaction. DNA templates containing wild-type N1 or N2,  
124 or mutant variants of N1, were synthesized as custom single-stranded oligos (Thermo Fisher Scientific). A

125 summary of the DNA template sequences used in this study is shown in Table 2. Each synthetic was dissolved in  
126 TE with Poly A and diluted to a target final concentration of 100, 1,000, or 10,000 copies per reaction assuming  
127 complete resuspension of the molar synthesis yield provided by the manufacturer. The concentration of each  
128 template was verified through determination of the most probable number (MPN) from a proportion of positive  
129 and negative results (Hurley & Roscoe, 1983). To obtain MPN estimates, each resuspended DNA template was  
130 diluted to approximately one copy per reaction in TE with Poly A. A range of 28 to 30 replicate PCR reactions was  
131 analyzed for the presence or absence of product signal. DNA templates containing the corresponding mutations  
132 found in the N1 region of specific Omicron variants (BA.1, BA.5.2, and BA.5.2.1) were synthesized and prepared  
133 using the same method. The statistical significance of mean  $C_q$  results obtained with each mutant template was  
134 evaluated by one-way ANOVA with comparison of means by Dunnett's Method using wild-type template results  
135 as the control.

136

### 137 Results

138 Three sets of experiments were performed to characterize the N1N2 single-channel multiplex design used in the  
139 IDEXX SARS-COV-2 Test. First, qualitative and quantitative performance of the N1N2 single-channel multiplex,  
140 including standard curve properties, was compared with results obtained using individual N1 and N2 reactions.  
141 Testing was performed using different combinations of primers and probes (Table 1) and all reactions included a  
142 single-stranded RNA template containing both wild-type N1 and N2 regions. Second, the N1N2 single-channel  
143 multiplex was tested with different combinations of DNA templates. Testing was performed by providing  
144 synthetic sequences containing either N1, N2, or a mixture of the N1 and N2 regions at equal concentration  
145 (Table 2). Third, the impact of real-world mutations in the N1 probe annealing region was examined. The relative  
146 performance of the N1N2 single-channel multiplex and the individual N1 and N2 reactions was compared using  
147 three different mutant N1 template sequences found in recent Omicron lineages (Table 2).

148

### 149 *Characterization of N1N2 Single-Channel Multiplex*

150 The N1N2 single-channel multiplex and individual N1 and N2 reactions were tested with three concentrations of  
151 RNA template containing the N gene. Results for all conditions are shown in Figure 1, and a summary of  $C_q$   
152 values obtained for all technical replicates is provided in Table 3. The results show that the individual N1 and N2  
153 reactions, when tested separately, produce very similar amplification curves. The N1N2 single-channel multiplex  
154 reaction, which detects a composite signal from the N1 and N2 reactions using one fluorophore (FAM),  
155 produced a stronger fluorescence that was detected earlier in the reaction, with no significant change in  
156 background affecting threshold values compared to the individual N1 and N2 assays. Closer inspection showed  
157 that fluorescent signal from the N1N2 multiplex was an additive combination of the individual N1 and N2  
158 reactions. Consistent with these observations, the mean  $C_q$  values obtained across all template concentrations  
159 showed the individual N2 reaction produced virtually the same result as the individual N1 reaction with a  
160 difference of only 0.32 cycles. The combined N1N2 reaction showed earlier detection by 1.33 and 1.01 cycles  
161 when compared to the individual N1 and N2 reactions, respectively. The intra-assay repeatability of the N1N2  
162 multiplex was not significantly different ( $p>0.05$ ) from the individual N1 and N2 reactions and all three reactions  
163 showed high precision, with low  $C_q$  standard deviations ranging from 0.07 to 0.19 across all template  
164 concentrations (Table 3). Collectively these results demonstrated the N1N2 multiplex reaction to behave  
165 consistently and predictably.

166

167 To assess quantitative performance of each primer and probe combination, the data presented in Table 3 were  
168 used to generate three-point standard curves (Figure 2 and Table 4). The use of six technical replicates at each  
169 template concentration allowed reliable comparisons to be made. All three primer and probe mixtures produced  
170 consistent standard curves with high  $R^2$  values  $>0.997$  and efficiency values ranging from 100 to 103%. These  
171 compare favorably to MIQE guidance values of  $>0.98 R^2$  and 90 to 110% efficiency (Bustin et al., 2009). Reactions  
172 containing the N1 Mix or N2 Mix produced very similar results. Results with the N1N2 Mix showed no significant  
173 difference in slope,  $R^2$ , or efficiency relative to N1 Mix or N2 Mix. The N1N2 Mix produced a y-intercept shift of  
174 1.1 cycles as expected due to the observed bias in  $C_q$  results between the reactions (Table 3).



175

176 The obtained standard curves allowed the N1N2 reaction to produce the same quantitative result as the  
177 individual N1 and N2 reactions. For example, the concentration of the 1,000-copy dilution was back-calculated  
178 from its mean  $C_q$ , as if it was an unknown sample. Results obtained with the N1 Mix and N2 Mix produced  
179 respective concentrations of 971 and 972 copies per reaction using the corresponding standard curve for each  
180 reaction. Similarly, results obtained with the N1N2 Mix produced a virtually identical result of 980 copies per  
181 reaction. Analogous results were obtained across the entire range of the standard curve, with the N1N2 reaction  
182 showing a maximum difference in calculated result from the N1 or N2 assays of 1.0%. These data demonstrate  
183 that the N1N2 single-channel multiplex reaction provided similar quantitative performance with no significant  
184 difference in accuracy or precision from individual N1 or N2 reactions.

185

#### 186 *Results with N1 and N2 DNA templates*

187 The combined N1N2 reaction was further characterized in a second complementary approach where the N1N2  
188 Mix was tested with different templates. Experiments were performed in which single-stranded DNA oligos,  
189 containing either the wild-type N1 or N2 target region, were added individually or in combination as reaction  
190 template. Tested DNA oligos are shown in Table 2.

191

192 When tested individually with N1N2 Mix, similar  $C_q$  values were observed for the wild-type N1 and N2  
193 templates, with N1 detected slightly earlier than N2 by an average of 0.66 cycles across all three template  
194 concentrations (Table 5). When the wild-type N1 and N2 templates were combined, the N1N2 Mix provided  
195 earlier detection than was observed with the individual N1 (0.93 cycles) or N2 (1.59 cycles) templates. Similar  
196 precision was observed with each template (Table 3) and intra-assay repeatability across the three templates  
197 was not significantly different ( $p>0.05$ ). These results were generally consistent with the findings above using  
198 RNA where (1) detection of the individual target regions using N1 Mix and N2 Mix produced similar  $C_q$  results,

199 and (2) simultaneous detection of the N1 and N2 regions using N1N2 Mix showed earlier detection than either  
200 individual reaction (Table 3).

201

202 The consistent results obtained from both sets of experiments (Tables 3 and 5) suggest that potential artifacts of  
203 these experimental approaches were unlikely to have had a large effect. The most likely source of error was in  
204 the second experiment where differences in the concentration of the N1 and N2 templates could contribute to  
205 the observed differences in  $C_q$  (Table 5). To evaluate this possibility the concentration of each template  
206 preparation was estimated using a most probable number (MPN) determined from a proportion of positive and  
207 negative results obtained when each template was diluted to approximately one copy per reaction. For the wild-  
208 type N1 template, 13 of 28 replicate reactions showed positive results, producing an MPN of 0.62 copies per  
209 reaction (95% confidence interval: 0.36 to 1.1). Similarly, for the wild-type N2 template, 15 of 30 replicate  
210 reactions were positive, producing an MPN of 0.69 copies per reaction (95% confidence interval: 0.41 to 1.2).  
211 These results confirmed the relative concentrations of each template were not meaningfully different and both  
212 N1 and N2 were present at the approximate concentrations indicated in Table 5.

213

#### 214 *Performance with mutant templates*

215 Collectively the results above show the primers and probes for detection of N1 and N2 perform similarly and  
216 provide a predictable, additive result when combined on a single fluorescent channel. Importantly, the  
217 maximum difference observed between the single-channel N1N2 multiplex reaction and individual N1 or N2  
218 reactions was relatively small and only slightly larger than one cycle (range 0.93 to 1.59; Tables 3 and 5). It is  
219 expected that the single-channel N1N2 multiplex reaction would show a maximum  $C_q$  increase of similar  
220 magnitude if either the N1 or N2 reaction was completely disrupted by any another mechanism, such as a  
221 mutation in a primer or probe annealing site. These results predict that the N1N2 multiplex reaction will be less  
222 sensitive to mutation than either the individual N1 or N2 reactions.

223

224 To test this hypothesis, the impact of real-world mutations in the N1 target region was examined with the N1N2  
225 multiplex reaction. Analysis of SARS-CoV-2 sequences obtained from the GISAID database (GISAID, 2020)  
226 throughout the pandemic initially showed the N1 and N2 annealing regions to be affected only by rare and  
227 sporadic mutations that were not enriched in the circulating population (data not shown). Sequences analyzed  
228 between December 2021 and March 2023 related to the dominant Omicron variant lineages showed the first  
229 evidence of a prevalent mutation, defined by the authors as occurring in >5% of the sequence population,  
230 affecting the probe annealing site in N1 (data not shown). Later Omicron variants showed additional prevalent  
231 mutations also affecting the N1 probe annealing site. Here, three combinations of these nucleic acid  
232 substitutions in N1 were selected for study, representing those found in Omicron variants B.1.1.529, BA.5.2, and  
233 BA.5.2.1 (Table 2).

234

235 Testing was performed using two conditions in a similar experimental approach to that described above. First,  
236 the impact of each mutant sequence on N1 detection was measured in the absence of N2 template. Second, the  
237 impact of each mutant sequence on combined detection of N1 and N2 using the single-channel multiplex  
238 reaction was measured when both N1 and N2 templates were added to the reaction. The second condition  
239 mimics the natural detection of SARS-CoV-2 where detection of a single viral genome containing intact N gene is  
240 accomplished by simultaneous amplification of both the N1 and N2 regions. A summary of the results is shown  
241 in Figure 3 and Table 6.

242

243 Results with the individual N1 templates showed that each mutation reduced the effectiveness of detection,  
244 with the B.1.1.529, BA.5.2, and BA.5.2.1 sequences showing mean  $C_q$  increases compared to wild-type of 0.95,  
245 2.81, and 2.40 cycles, respectively, across both template concentrations tested. The  $C_q$  results for each mutant  
246 obtained with the individual N1 reaction were found to be significantly different ( $p < 0.05$ ) from the wild-type  
247 control in all conditions tested. These relative differences were consistent with the expectation that the double  
248 and triple mutations contained in BA.5.2 and BA.5.2.1 templates, which reside at both ends of the N1 probe

249 annealing region, would be more disruptive than the single mutation found in B.1.1.529. Reduced detection of  
250 BA.5.2 and BA.5.2.1 produced a 5.3-fold to 7.0-fold relative underestimation of the actual template  
251 concentration, representing a significant reduction in accuracy for the individual N1 reaction.  
252  
253 In contrast, the single-channel N1N2 multiplex reaction was more resistant to mutation, with the B.1.1.529,  
254 BA.5.2, and BA.5.2.1 sequences showing average increases of 0.58, 0.32, and 0.87 cycles, respectively, across  
255 both template concentrations tested. These results showed that the N2 reaction compensated almost entirely  
256 for the defects in N1 reaction caused by mutation and produced a much smaller range of underestimation of  
257 only 1.3-fold to 1.8-fold (Table 5). The statistical significance of these results varied among the conditions tested.  
258 At the 100-copy level, all three mutant templates were not significantly different ( $p>0.05$ ) from the wild-type  
259 control when tested with the N1N2 multiplex reaction. At the 1000-copy level, only the BA.5.2 mutant was not  
260 significantly different ( $p>0.05$ ) from the wild-type control. Taken together, the effect of each mutation on the  
261 N1N2 multiplex was consistently smaller than the corresponding differences observed with the individual N1  
262 assay, and the impacts of such mutations on the N1N2 assay are unlikely to have a material impact on  
263 wastewater surveillance trending (see Discussion). Similar results were obtained in a second set of experiments  
264 using independently obtained and prepared synthetic materials (data not shown).  
265  
266 Although this study has specifically examined mutations in the N1 probe annealing region due to their  
267 importance for surveillance of Omicron lineages, it is expected that the single-channel N1N2 multiplex reaction  
268 will be similarly less sensitive to mutations occurring in either the N1 or N2 annealing regions, including changes  
269 affecting either primer or probe annealing regions. This is consistent with the results above showing a maximum  
270 shift of approximately one cycle when either individual reaction was completely disrupted (Table 5).  
271  
272 Discussion

273 Previous work by Nagy et al. (2017) and Yip et al. (2005) showed the advantages of using identically labelled  
274 probes to increase target inclusivity and reduce false negative results caused by mutations in probe binding  
275 regions. In this study it was shown that similar benefits can be achieved using a broader approach in which two  
276 independent amplification reactions that each use an identically labelled probe are combined. An important  
277 benefit of this single-channel multiplex approach is that the entirety of each assay design, including both primer  
278 and probe annealing regions, becomes more resistant to mutations.

279

280 Our results with the single-channel N1N2 multiplex assay demonstrated similar performance characteristics to  
281 those reported by Nagy et al. and Yip et al., including stronger fluorescence intensity, earlier  $C_q$  results, high  
282 precision in intra-assay technical replicates, accurate standard curve performance, and improved detection of  
283 mutant sequences. Our results also showed that the N1N2 assay achieved these benefits without altering the  
284 performance characteristics of the individual N1 and N2 reactions. Taken together, these results show that the  
285 N1N2 multiplex assay reduced the impact of real-world mutations in the N1 region while retaining consistent  
286 and accurate quantification of SARS-CoV-2 with equivalent performance to the individual N1 or N2 assays.

287

288 Although the N1 and N2 reactions were designed in conserved regions, prevalent sequence changes have  
289 recently been observed in the N1 region of Omicron variant lineages and these mutations were found to  
290 significantly reduce the accuracy of an individual N1 reaction. In real-world surveillance of wastewater  
291 containing such Omicron variants, a laboratory using individual N1 and N2 assays would likely observe a growing  
292 divergence in results between the two assays caused by these mutations, with a concomitant increase in  
293 uncertainty of results interpretation. In contrast, a laboratory using the N1N2 multiplex assay is expected to  
294 observe only small changes in trending accuracy as such mutations emerge and spread through a monitored  
295 community. The average relative impact of the Omicron mutations on the N1N2 multiplex was a  $C_q$  shift of  $\leq 0.87$   
296 cycles (Table 6). Furthermore, in the extreme situation where detection of either N1 or N2 was completely  
297 absent, the maximum impact on the N1N2 multiplex was a  $C_q$  shift of 1.33 cycles (Tables 3 and 5). This is only

298 slightly larger in magnitude than an acceptable margin of error for RT-qPCR recently recommended for  
299 wastewater surveillance (<0.5 standard deviation for technical triplicate measurements) (Chik et al., 2022).  
300 When considered in the context of the overall wastewater testing process, the effect of these mutations on the  
301 N1N2 multiplex assay was insignificant compared to other, larger sources of variation existing in upstream  
302 wastewater concentration and handling steps (Pecson et al., 2021).  
303  
304 The single-channel multiplex N1N2 assay described here provides a reliable and advantageous approach for RT-  
305 qPCR surveillance with target regions that are susceptible to mutation. In comparison, the larger impact of  
306 mutations on individual N1 and N2 assays can reduce confidence in results interpretation and increase the need  
307 for auxiliary information from complementary monitoring strategies, such as sequencing, to assess the impact of  
308 emerging mutations. Although sequencing is inherently valuable and should be used regardless of RT-qPCR assay  
309 design, the interpretation of results from the single-channel N1N2 multiplex assay is less dependent on  
310 sequencing data. This allows public-health decisions to be made more quickly and confidently from trending  
311 data produced using the N1N2 multiplex test. The multiplex assay also allows a simpler testing process that  
312 requires fewer RT-qPCR reactions and can reduce the potential for technical errors. Collectively, this study  
313 showed that the single-channel N1N2 multiplex assay can be used in place of individual N1 and N2 reactions to  
314 increase the reliability and accuracy of wastewater surveillance trending data for the evolving SARS-CoV-2  
315 target. Given these advantages, it is expected that a similar single-channel approach will be beneficial in other  
316 surveillance programs that monitor nucleic acid targets susceptible to mutation.  
317

318 References

- 319 Agrawal, S., Orschler, L., & Lackner, S. (2021). Long-term monitoring of SARS-CoV-2 RNA in wastewater of the  
320 Frankfurt metropolitan area in Southern Germany. *Scientific Reports*, *11*(1).  
321 <https://doi.org/10.1038/s41598-021-84914-2>
- 322 Arora, S., Nag, A., Sethi, J., Rajvanshi, J., Saxena, S., Shrivastava, S. K., & Gupta, A. B. (2020). Sewage surveillance  
323 for the presence of SARS-CoV-2 genome as a useful wastewater based epidemiology (WBE) tracking tool in  
324 India. *Water Science and Technology*, *82*(12). <https://doi.org/10.2166/wst.2020.540>
- 325 Aw, T. G., & Rose, J. B. (2012). Detection of pathogens in water: from phylochips to qPCR to pyrosequencing.  
326 *Current Opinion in Biotechnology*, *23*(3), 422–430. <https://doi.org/10.1016/J.COPBIO.2011.11.016>
- 327 Brooks, Y. M., Gryskwicz, B., Sheehan, S., Piers, S., Mahale, P., McNeil, S., Chase, J., Webber, D., Borys, D., Hilton,  
328 M., Robinson, D., Sears, S., Smith, E., Leshner, E. K., Wilson, R., Goodwin, M., & Pardales, M. (2021).  
329 Detection of SARS-CoV-2 in wastewater at residential college, Maine, USA, August–November 2020.  
330 *Emerging Infectious Diseases*, *27*(12). <https://doi.org/10.3201/eid2712.211199>
- 331 Brooks, Y. M., Gryskwicz, B., Sidaway, E., Shelley, B., Coroi, L., Downing, M., Downing, T., McDonnell, S., Ostrye,  
332 D., Hoop, K., & Parrish, G. (2023). A case study of a community-organized wastewater surveillance in a  
333 small community: correlating weekly reported COVID-19 cases with SARS-CoV-2 RNA concentrations during  
334 fall 2020 to summer 2021 in Yarmouth, ME. *Journal of Water and Health*, *jwh2023238*.  
335 <https://doi.org/10.2166/wh.2023.238>
- 336 Bustin, S. A., Benes, V., Garson, J. A., Hellemans, J., Huggett, J., Kubista, M., Mueller, R., Nolan, T., Pfaffl, M. W.,  
337 Shipley, G. L., Vandesompele, J., & Wittwer, C. T. (2009). The MIQE guidelines: Minimum information for  
338 publication of quantitative real-time PCR experiments. *Clinical Chemistry*, *55*(4).  
339 <https://doi.org/10.1373/clinchem.2008.112797>
- 340 Chik, A. H. S., Abbey, A.-M., Flemming, C. A., Fletcher, T., Ho, J. J. Y., Oke, M., Pileggi, V., Raby, M., Simhon, A.,  
341 Thomas, J., Weir, S., D’Aoust, P. M., Brown, S., Chao, T.-C., Daigle, J., Delatolla, R., Dhiyebi, H. A.,  
342 Donaldson, M., Edwards, E., ... Xie, Y. (2022). *Protocol for Evaluations of RT-qPCR Performance*  
343 *Characteristics: Technical Guidance*.
- 344 European Commission. (2021). Commission Recommendation of 17.3.2021 on a common approach to establish  
345 a systematic surveillance of SARS-CoV-2 and its variants in wastewaters in the EU. *Official Journal*, *C*(1925).
- 346 Farkas, K., Hillary, L. S., Malham, S. K., McDonald, J. E., & Jones, D. L. (2020). Wastewater and public health: the  
347 potential of wastewater surveillance for monitoring COVID-19. *Current Opinion in Environmental Science &*  
348 *Health*, *17*, 14–20. <https://doi.org/10.1016/J.COESH.2020.06.001>
- 349 Galani, A., Aalizadeh, R., Kostakis, M., Markou, A., Alygizakis, N., Lytras, T., Adamopoulos, P. G., Peccia, J.,  
350 Thompson, D. C., Kontou, A., Karagiannidis, A., Lianidou, E. S., Avgeris, M., Paraskevis, D., Tsiodras, S.,  
351 Scorilas, A., Vasiliou, V., Dimopoulos, M. A., & Thomaidis, N. S. (2022). SARS-CoV-2 wastewater surveillance  
352 data can predict hospitalizations and ICU admissions. *Science of the Total Environment*, *804*.  
353 <https://doi.org/10.1016/j.scitotenv.2021.150151>
- 354 GISAID. (2020). GISAID Initiative. In *Advances in Virus Research* (Vol. 2008).
- 355 Hopkins, L., Persse, D., Caton, K., Ensor, K., Schneider, R., McCall, C., & Stadler, L. B. (2023). Citywide wastewater  
356 SARS-CoV-2 levels strongly correlated with multiple disease surveillance indicators and outcomes over



- 357 three COVID-19 waves. *Science of The Total Environment*, 855, 158967.  
358 <https://doi.org/10.1016/j.SCITOTENV.2022.158967>
- 359 Hurley, M. A., & Roscoe, M. E. (1983). Automated statistical analysis of microbial enumeration by dilution series.  
360 *Journal of Applied Bacteriology*, 55(1), 159–164. <https://doi.org/10.1111/j.1365-2672.1983.tb02660.x>
- 361 Kidd, M., Richter, A., Best, A., Cumley, N., Mirza, J., Percival, B., Mayhew, M., Megram, O., Ashford, F., White, T.,  
362 Moles-Garcia, E., Crawford, L., Bosworth, A., Atabani, S. F., Plant, T., & McNally, A. (2021). S-Variant SARS-  
363 CoV-2 Lineage B.1.1.7 Is Associated With Significantly Higher Viral Load in Samples Tested by TaqPath  
364 Polymerase Chain Reaction. *The Journal of Infectious Diseases*, 223(10).  
365 <https://doi.org/10.1093/infdis/jiab082>
- 366 Kirby, A. E., Walters, M. S., Jennings, W. C., Fugitt, R., LaCross, N., Mattioli, M., Marsh, Z. A., Roberts, V. A.,  
367 Mercante, J. W., Yoder, J., & Hill, V. R. (2021). Using Wastewater Surveillance Data to Support the COVID-  
368 19 Response — United States, 2020–2021. *MMWR Recommendations and Reports*, 70(36).  
369 <https://doi.org/10.15585/mmwr.mm7036a2>
- 370 Lu, X., Wang, L., Sakthivel, S. K., Whitaker, B., Murray, J., Kamili, S., Lynch, B., Malapati, L., Burke, S. A., Harcourt,  
371 J., Tamin, A., Thornburg, N. J., Villanueva, J. M., & Lindstrom, S. (2020). US CDC real-time reverse  
372 transcription PCR panel for detection of severe acute respiratory syndrome Coronavirus 2. *Emerging*  
373 *Infectious Diseases*, 26(8). <https://doi.org/10.3201/eid2608.201246>
- 374 Mascuch, S. J., Fakhretaha-Aval, S., Bowman, J. C., Ma, M. T. H., Thomas, G., Bommarius, B., Ito, C., Zhao, L.,  
375 Newnam, G. P., Matange, K. R., Thapa, H. R., Barlow, B., Donegan, R. K., Nguyen, N. A., Saccuzzo, E. G.,  
376 Obianyor, C. T., Karunakaran, S. C., Pollet, P., Rothschild-Mancinelli, B., ... Lieberman, R. L. (2020). A  
377 blueprint for academic laboratories to produce SARS-cov-2 quantitative RT-PCR test kits. *Journal of*  
378 *Biological Chemistry*, 295(46). <https://doi.org/10.1074/jbc.RA120.015434>
- 379 Nagy, A., Vitásková, E., Černíková, L., Křivda, V., Jiřincová, H., Sedlák, K., Horníčková, J., & Havlíčková, M. (2017).  
380 Evaluation of TaqMan qPCR system integrating two identically labelled hydrolysis probes in single assay.  
381 *Scientific Reports*, 7. <https://doi.org/10.1038/srep41392>
- 382 Peccia, J., Zulli, A., Brackney, D. E., Grubaugh, N. D., Kaplan, E. H., Casanovas-Massana, A., Ko, A. I., Malik, A. A.,  
383 Wang, D., Wang, M., Warren, J. L., Weinberger, D. M., Arnold, W., & Omer, S. B. (2020). Measurement of  
384 SARS-CoV-2 RNA in wastewater tracks community infection dynamics. *Nature Biotechnology*, 38(10).  
385 <https://doi.org/10.1038/s41587-020-0684-z>
- 386 Pecson, B. M., Darby, E., Haas, C. N., Amha, Y. M., Bartolo, M., Danielson, R., Dearborn, Y., di Giovanni, G.,  
387 Ferguson, C., Fevig, S., Gaddis, E., Gray, D., Lukasik, G., Mull, B., Olivas, L., Olivieri, A., Qu, Y., & Sars-Cov-2  
388 Interlaboratory Consortium. (2021). Reproducibility and sensitivity of 36 methods to quantify the SARS-  
389 CoV-2 genetic signal in raw wastewater: Findings from an interlaboratory methods evaluation in the U.S.  
390 *Environmental Science: Water Research and Technology*, 7(3). <https://doi.org/10.1039/d0ew00946f>
- 391 Prado, T., Fumian, T. M., Mannarino, C. F., Resende, P. C., Motta, F. C., Eppinghaus, A. L. F., Chagas do Vale, V.  
392 H., Braz, R. M. S., de Andrade, J. da S. R., Maranhão, A. G., & Miagostovich, M. P. (2021). Wastewater-  
393 based epidemiology as a useful tool to track SARS-CoV-2 and support public health policies at municipal  
394 level in Brazil. *Water Research*, 191. <https://doi.org/10.1016/j.watres.2021.116810>
- 395 United States Food and Drug Administration. (2020, May 6). *OPTI SARS-CoV-2 RT PCR Test*.  
396 <https://www.fda.gov/media/137737/download>.



397 Yip, S. P., To, S. S. T., Leung, P. H. M., Cheung, T. S., Cheng, P. K. C., & Lim, W. W. L. (2005). Use of dual TaqMan  
398 probes to increase the sensitivity of 1-step quantitative reverse transcription-PCR: Application to the  
399 detection of SARS coronavirus. *Clinical Chemistry*, 51(10). <https://doi.org/10.1373/clinchem.2005.054106>

400

401

Table 1. Combinations of Primers and Probes used for detection of SARS-CoV-2 by RT-qPCR.

| Target Region | Sequence Type | Sequence (5'-3') <sup>1</sup>           | Length (bases) | Primer and Probe Mixture |        |          |
|---------------|---------------|-----------------------------------------|----------------|--------------------------|--------|----------|
|               |               |                                         |                | N1 Mix                   | N2 Mix | N1N2 Mix |
| N1            | Forward       | <u>GACCCCAAAAATCAGCGAAAT</u>            | 20             | +                        | -      | +        |
|               | Reverse       | <u>TCTGGTTACTGCCAGTTGAATCTG</u>         | 24             | +                        | -      | +        |
|               | Probe         | <u>FAM-ACCCCGCATTACGTTGGTGGACC-BHQ1</u> | 24             | +                        | -      | +        |
| N2            | Forward       | <u>TTACAAACATTGGCCGCAA</u>              | 20             | -                        | +      | +        |
|               | Reverse       | <u>GCGCGACATTCGGAAGAA</u>               | 18             | -                        | +      | +        |
|               | Probe         | <u>FAM-ACAATTTGCCCCAGCGCTTCAG-BHQ1</u>  | 23             | -                        | +      | +        |

<sup>1</sup> (Lu et al., 2020)

Table 2. Synthetic SARS-CoV-2 DNA template sequences used for RT-qPCR.

| Target Region | Lineage                | Sequence (5'-3') <sup>1</sup>                                                                              | Length (bases) |
|---------------|------------------------|------------------------------------------------------------------------------------------------------------|----------------|
| N1            | Wuhan-Hu-1             | <u>TGGACCCCAAAAATCAGCGAAAT</u> <u>GCACCCCGCATTACGTTGGTGGACCCTCAGATTCAACTGGCAGTAACCAGAAT</u>                | 76             |
|               | B.1.1.529 <sup>2</sup> | <u>TGGACCCCAAAAATCAGCGAAAT</u> <u>GCAC<b>T</b>CCGCGATTACGTTGGTGGACCCTCAGATTCAACTGGCAGTAACCAGAAT</u>        | 76             |
|               | BA.5.2 <sup>2</sup>    | <u>TGGACCCCAAAAATCAGCGAAAT</u> <u>GCAC<b>T</b>CCGCGATTACGTTGGTGG<b>G</b>CCCTCAGATTCAACTGGCAGTAACCAGAAT</u> | 76             |
|               | BA.5.2.1 <sup>2</sup>  | <u>TGGACCCCAAAAATCAGCGAAAT</u> <u>GCAT<b>T</b>CCGCGATTACGTTGGTGG<b>G</b>CCCTCAGATTCAACTGGCAGTAACCAGAAT</u> | 76             |
| N2            | Wuhan-Hu-1             | <u>GAT<b>T</b>TACAAACATTGGCCGCAA</u> <u>TTGCACAATTTGCCCCAGCGCTTCAGCGTTCTTCGGGAATGTCGCGCAT</u>              | 71             |

<sup>1</sup> DNA templates for RT-qPCR were prepared from custom synthetic oligonucleotides containing N1 or N2 regions corresponding to positions 28,285 – 28,360 and 29,162 – 29,232 in the Wuhan-Hu-1 reference sequence (NCBI NC\_045512.2), respectively. Primer and probe annealing sites within each template are underlined in blue and purple, respectively. Nucleotide substitutions in each variant sequence are shown in bold and red font.

Table 3: Quantitative comparison of different primer and probe combinations (N1 Mix, N2 Mix, and N1N2 Mix) for detection of single-stranded RNA containing the N gene.

| Template concentration (copies per reaction) <sup>1</sup> | N1 Mix <sup>2</sup> |                          | N2 Mix <sup>2</sup> |                          | N1N2 Mix <sup>2</sup> |                          | Mean C <sub>q</sub> Difference <sup>3</sup> |                   |                   |
|-----------------------------------------------------------|---------------------|--------------------------|---------------------|--------------------------|-----------------------|--------------------------|---------------------------------------------|-------------------|-------------------|
|                                                           | C <sub>q</sub>      | Mean C <sub>q</sub> (SD) | C <sub>q</sub>      | Mean C <sub>q</sub> (SD) | C <sub>q</sub>        | Mean C <sub>q</sub> (SD) | N1 Mix - N2 Mix                             | N1 Mix - N1N2 Mix | N2 Mix - N1N2 Mix |
| 100                                                       | 30.8                | 31.1 (0.19)              | 30.7                | 30.8 (0.08)              | 29.7                  | 29.8 (0.07)              | 0.28                                        | 1.29              | 1.01              |
|                                                           | 31.1                |                          | 30.7                |                          | 29.8                  |                          |                                             |                   |                   |
|                                                           | 31.0                |                          | 30.8                |                          | 29.8                  |                          |                                             |                   |                   |
|                                                           | 31.4                |                          | 30.8                |                          | 29.6                  |                          |                                             |                   |                   |
|                                                           | 31.1                |                          | 30.9                |                          | 29.9                  |                          |                                             |                   |                   |
|                                                           | 31.0                |                          | 30.7                |                          | 29.7                  |                          |                                             |                   |                   |
| 1,000                                                     | 27.8                | 27.9 (0.08)              | 27.4                | 27.5 (0.09)              | 26.5                  | 26.5 (0.07)              | 0.32                                        | 1.34              | 1.02              |
|                                                           | 27.8                |                          | 27.5                |                          | 26.4                  |                          |                                             |                   |                   |
|                                                           | 27.8                |                          | 27.5                |                          | 26.5                  |                          |                                             |                   |                   |
|                                                           | 27.9                |                          | 27.5                |                          | 26.6                  |                          |                                             |                   |                   |
|                                                           | 28.0                |                          | 27.6                |                          | 26.6                  |                          |                                             |                   |                   |
|                                                           | 27.8                |                          | 27.6                |                          | 26.5                  |                          |                                             |                   |                   |
| 10,000                                                    | 24.4                | 24.5 (0.11)              | 24.1                | 24.2 (0.09)              | 23.0                  | 23.2 (0.12)              | 0.36                                        | 1.36              | 1.00              |
|                                                           | 24.4                |                          | 24.1                |                          | 23.2                  |                          |                                             |                   |                   |
|                                                           | 24.5                |                          | 24.2                |                          | 23.2                  |                          |                                             |                   |                   |
|                                                           | 24.6                |                          | 24.2                |                          | 23.2                  |                          |                                             |                   |                   |
|                                                           | 24.6                |                          | 24.3                |                          | 23.2                  |                          |                                             |                   |                   |
|                                                           | 24.7                |                          | 24.3                |                          | 23.3                  |                          |                                             |                   |                   |

<sup>1</sup> RNA template added to each reaction contained wild-type N1 and wild-type N2 target regions. Template dilutions were prepared from certified RNA reference material (Quantitative Synthetic SARS-CoV-2 RNA; ATCC VR-3276SD).

<sup>2</sup>Primers and probes used in each reaction mixture shown in Table 1. Differences in detection resulted from the presence or absence of primers and probes to detect the N1 and N2 target regions. For each group of technical replicates, the mean C<sub>q</sub> and standard deviation (in parentheses) is shown.

<sup>3</sup>The difference between mean C<sub>q</sub> results was determined for each pair of reactions containing different primer and probe mixtures. Mean C<sub>q</sub> differences across all template concentrations were as follows: N1 Mix - N2 Mix: 0.32, N1 Mix - N1N2 Mix: 1.33, N2 Mix - N1N2 Mix: 1.01.

Table 4: Standard curve quality parameters obtained using N1 Mix, N2 Mix, and N1N2 Mix to detect single-stranded RNA containing the N gene.

| Primer & Probe Mixture <sup>1</sup> | Slope | Y-Intercept | R <sup>2</sup> | Efficiency |
|-------------------------------------|-------|-------------|----------------|------------|
| N1 Mix                              | -3.26 | 37.6        | 0.998          | 102.8%     |
| N2 Mix                              | -3.30 | 37.4        | 0.998          | 100.9%     |
| N1N2 Mix                            | -3.29 | 36.4        | 0.999          | 101.2%     |

<sup>1</sup>See Table 1 for primers and probes contained in in each mixture.

Table 5: Detection of wild-type N1 or wild-type N2 DNA templates, added individually or in combination, using N1N2 Mix.

| Template concentration (copies per reaction) <sup>1</sup> | N1 template <sup>2</sup> |                          | N2 template <sup>2</sup> |                          | N1 & N2 template <sup>2</sup> |                          | Mean C <sub>q</sub> Difference <sup>3</sup> |                                |                                |
|-----------------------------------------------------------|--------------------------|--------------------------|--------------------------|--------------------------|-------------------------------|--------------------------|---------------------------------------------|--------------------------------|--------------------------------|
|                                                           | C <sub>q</sub>           | Mean C <sub>q</sub> (SD) | C <sub>q</sub>           | Mean C <sub>q</sub> (SD) | C <sub>q</sub>                | Mean C <sub>q</sub> (SD) | N1 template - N2 template                   | N1 template - N1 & N2 template | N2 template - N1 & N2 template |
| 100                                                       | 31.7                     | 31.9<br>(0.40)           | 32.5                     | 32.6<br>(0.31)           | 30.7                          | 30.9<br>(0.21)           | -0.63                                       | 1.06                           | 1.69                           |
|                                                           | 32.7                     |                          | 33.0                     |                          | 30.7                          |                          |                                             |                                |                                |
|                                                           | 31.8                     |                          | 32.5                     |                          | 30.8                          |                          |                                             |                                |                                |
|                                                           | 32.0                     |                          | 32.8                     |                          | 30.9                          |                          |                                             |                                |                                |
|                                                           | 32.0                     |                          | 32.4                     |                          | 31.2                          |                          |                                             |                                |                                |
|                                                           | 32.2                     |                          | 32.5                     |                          | 31.0                          |                          |                                             |                                |                                |
|                                                           | 31.7                     |                          | 32.0                     |                          | 31.1                          |                          |                                             |                                |                                |
|                                                           | 31.4                     |                          | 32.8                     |                          | 30.6                          |                          |                                             |                                |                                |
| 1,000                                                     | 28.1                     | 28.4<br>(0.18)           | 28.8                     | 29.1<br>(0.20)           | 27.2                          | 27.5<br>(0.17)           | -0.64                                       | 0.93                           | 1.57                           |
|                                                           | 28.5                     |                          | 29.0                     |                          | 27.4                          |                          |                                             |                                |                                |
|                                                           | 28.4                     |                          | 29.0                     |                          | 27.4                          |                          |                                             |                                |                                |
|                                                           | 28.7                     |                          | 29.1                     |                          | 27.7                          |                          |                                             |                                |                                |
|                                                           | 28.5                     |                          | 29.1                     |                          | 27.6                          |                          |                                             |                                |                                |
|                                                           | 28.6                     |                          | 29.2                     |                          | 27.7                          |                          |                                             |                                |                                |
|                                                           | 28.4                     |                          | 29.5                     |                          | 27.7                          |                          |                                             |                                |                                |
|                                                           | 28.4                     |                          | 28.9                     |                          | 27.4                          |                          |                                             |                                |                                |
| 10,000                                                    | 24.8                     | 24.9<br>(0.12)           | 25.4                     | 25.6<br>(0.11)           | 23.8                          | 24.1<br>(0.14)           | -0.72                                       | 0.80                           | 1.53                           |
|                                                           | 24.7                     |                          | 25.6                     |                          | 24.1                          |                          |                                             |                                |                                |
|                                                           | 24.9                     |                          | 25.6                     |                          | 24.2                          |                          |                                             |                                |                                |
|                                                           | 24.9                     |                          | 25.6                     |                          | 24.3                          |                          |                                             |                                |                                |
|                                                           | 25.0                     |                          | 25.8                     |                          | 24.0                          |                          |                                             |                                |                                |
|                                                           | 25.0                     |                          | 25.7                     |                          | 24.1                          |                          |                                             |                                |                                |
|                                                           | 25.0                     |                          | 25.7                     |                          | 24.1                          |                          |                                             |                                |                                |
|                                                           | 24.9                     |                          | 25.5                     |                          | 24.1                          |                          |                                             |                                |                                |

<sup>1</sup>DNA templates added to each reaction contained wild-type N1 and wild-type N2 target regions (Table 2). Each template (N1 or N2) was added at the indicated concentration.

<sup>2</sup>All reactions were performed using N1N2 Mix containing primers and probes for detection of both N1 and N2 regions. Differences in detection resulted from the presence or absence of N1 and N2 template regions. For each group of technical replicates, the mean C<sub>q</sub> and standard deviation (in parentheses) was determined. Results for each reaction were significantly different (p<0.05).

<sup>3</sup>The difference between mean C<sub>q</sub> results was determined for each pair of reactions containing different template combinations. Mean C<sub>q</sub> differences across all three template concentrations were as follows: N1 template - N2 template: -0.66, N1 template - N1 & N2 templates: 0.93, N2 template - N1 & N2 templates: 1.59.

Table 6: Quantitative detection of wild-type and mutant N1 template sequences using a single-channel multiplex reaction.

| Template concentration (copies per reaction) <sup>1</sup> | N1 Lineage <sup>2</sup> | N1 Template <sup>3</sup> |                     |                                                                    | N1 & N2 Template <sup>5</sup> |                     |                                                                    |
|-----------------------------------------------------------|-------------------------|--------------------------|---------------------|--------------------------------------------------------------------|-------------------------------|---------------------|--------------------------------------------------------------------|
|                                                           |                         | C <sub>q</sub>           | Mean C <sub>q</sub> | Mean C <sub>q</sub> Difference (mutant - wild-type) <sup>4,7</sup> | C <sub>q</sub>                | Mean C <sub>q</sub> | Mean C <sub>q</sub> Difference (mutant - wild-type) <sup>6,7</sup> |
| 100                                                       | Wild-type               | 30.4                     | 30.4                | N/A                                                                | 29.1                          | 29.5                | N/A                                                                |
|                                                           |                         | 30.4                     |                     |                                                                    | 29.6                          |                     |                                                                    |
|                                                           |                         | 30.9                     |                     |                                                                    | 29.2                          |                     |                                                                    |
|                                                           |                         | 29.9                     |                     |                                                                    | 30.0                          |                     |                                                                    |
|                                                           | B.1.1.529               | 31.5                     | 31.2                | 0.80                                                               | 29.7                          | 30.1                | 0.60                                                               |
|                                                           |                         | 31.3                     |                     |                                                                    | 30.3                          |                     |                                                                    |
|                                                           |                         | 31.4                     |                     |                                                                    | 29.8                          |                     |                                                                    |
|                                                           |                         | 30.6                     |                     |                                                                    | 30.5                          |                     |                                                                    |
|                                                           | BA.5.2                  | 33.3                     | 33.1                | 2.68                                                               | 29.6                          | 29.8                | 0.35                                                               |
|                                                           |                         | 33.3                     |                     |                                                                    | 29.9                          |                     |                                                                    |
|                                                           |                         | 33.1                     |                     |                                                                    | 29.7                          |                     |                                                                    |
|                                                           |                         | 32.6                     |                     |                                                                    | 30.1                          |                     |                                                                    |
|                                                           | BA5.2.1                 | 32.6                     | 32.4                | 2.04                                                               | 29.7                          | 30.1                | 0.68                                                               |
|                                                           |                         | 33.0                     |                     |                                                                    | 30.4                          |                     |                                                                    |
|                                                           |                         | 32.4                     |                     |                                                                    | 30.0                          |                     |                                                                    |
|                                                           |                         | 31.8                     |                     |                                                                    | 30.4                          |                     |                                                                    |
| 1,000                                                     | Wild-type               | 26.6                     | 26.7                | N/A                                                                | 25.6                          | 25.9                | N/A                                                                |
|                                                           |                         | 27.2                     |                     |                                                                    | 26.2                          |                     |                                                                    |
|                                                           |                         | 26.6                     |                     |                                                                    | 25.7                          |                     |                                                                    |
|                                                           |                         | 26.2                     |                     |                                                                    | 26.0                          |                     |                                                                    |
|                                                           | B.1.1.529               | 28.1                     | 27.8                | 1.10                                                               | 26.4                          | 26.5                | 0.55                                                               |
|                                                           |                         | 28.2                     |                     |                                                                    | 26.8                          |                     |                                                                    |
|                                                           |                         | 27.5                     |                     |                                                                    | 26.2                          |                     |                                                                    |
|                                                           |                         | 27.2                     |                     |                                                                    | 26.5                          |                     |                                                                    |
|                                                           | BA.5.2                  | 29.7                     | 29.6                | 2.95                                                               | 26.0                          | 26.2                | 0.28                                                               |
|                                                           |                         | 30.0                     |                     |                                                                    | 26.4                          |                     |                                                                    |
|                                                           |                         | 29.5                     |                     |                                                                    | 25.9                          |                     |                                                                    |
|                                                           |                         | 29.3                     |                     |                                                                    | 26.4                          |                     |                                                                    |
|                                                           | BA5.2.1                 | 29.5                     | 29.4                | 2.77                                                               | 26.7                          | 27.0                | 1.06                                                               |
|                                                           |                         | 29.5                     |                     |                                                                    | 27.2                          |                     |                                                                    |
|                                                           |                         | 29.6                     |                     |                                                                    | 26.5                          |                     |                                                                    |
|                                                           |                         | 29.1                     |                     |                                                                    | 27.3                          |                     |                                                                    |

<sup>1</sup>DNA templates added to each reaction contained wild-type N1, mutant N1 or wild-type N2 regions (Table 2).

<sup>2</sup>Mutations representing each N1 lineage and contained in tested N1 templates are shown in Table 2.

<sup>3</sup>Detection of each N1 template was measured in the absence of N2 template using N1N2 Mix (Table 1). Detected signal comprised only N1 reaction product.

<sup>4</sup>The impact of mutations on the individual N1 reaction was determined by subtracting the mean C<sub>q</sub> for wild-type N1 template from the mean C<sub>q</sub> for the mutant N1 template. Positive numbers indicate later detection. "N/A" indicates not applicable. The mean C<sub>q</sub> differences observed across both template concentrations were as follows: B.1.1.529: 0.95 cycles, BA.5.2: 2.81 cycles, BA.5.2.1: 2.40 cycles.

<sup>5</sup>Detection of both N1 and N2 templates was measured using N1N2 Mix (Table 1). Detected signal comprised a mixture of N1 and N2 reaction products. N1 and N2 templates were each provided at the indicated concentration.

<sup>6</sup>The impact of mutations on the single-channel N1N2 multiplex reaction was determined by subtracting the mean C<sub>q</sub> observed with wild-type N1 template from the mean C<sub>q</sub> observed with mutant N1 template. Positive numbers indicate later detection. "N/A" indicates not applicable. The mean C<sub>q</sub> differences observed across both template concentrations were as follows: B.1.1.529: 0.58 cycles, BA.5.2: 0.32 cycles, BA.5.2.1: 0.87 cycles.

<sup>7</sup>The statistical significance of differences between mutant and wild-type results was determined by one-way ANOVA with means comparison using Dunnett's Control (see text).

Figure 1: Detection of single-stranded RNA containing N1 and N2 regions at 100, 1,000, and 10,000 copies per reaction. Primer and probe combinations tested included N1 Mix (green) and N2 Mix (blue) and N1N2 Mix (red) (Table 1). All reactions used probes labelled with FAM fluorophore.

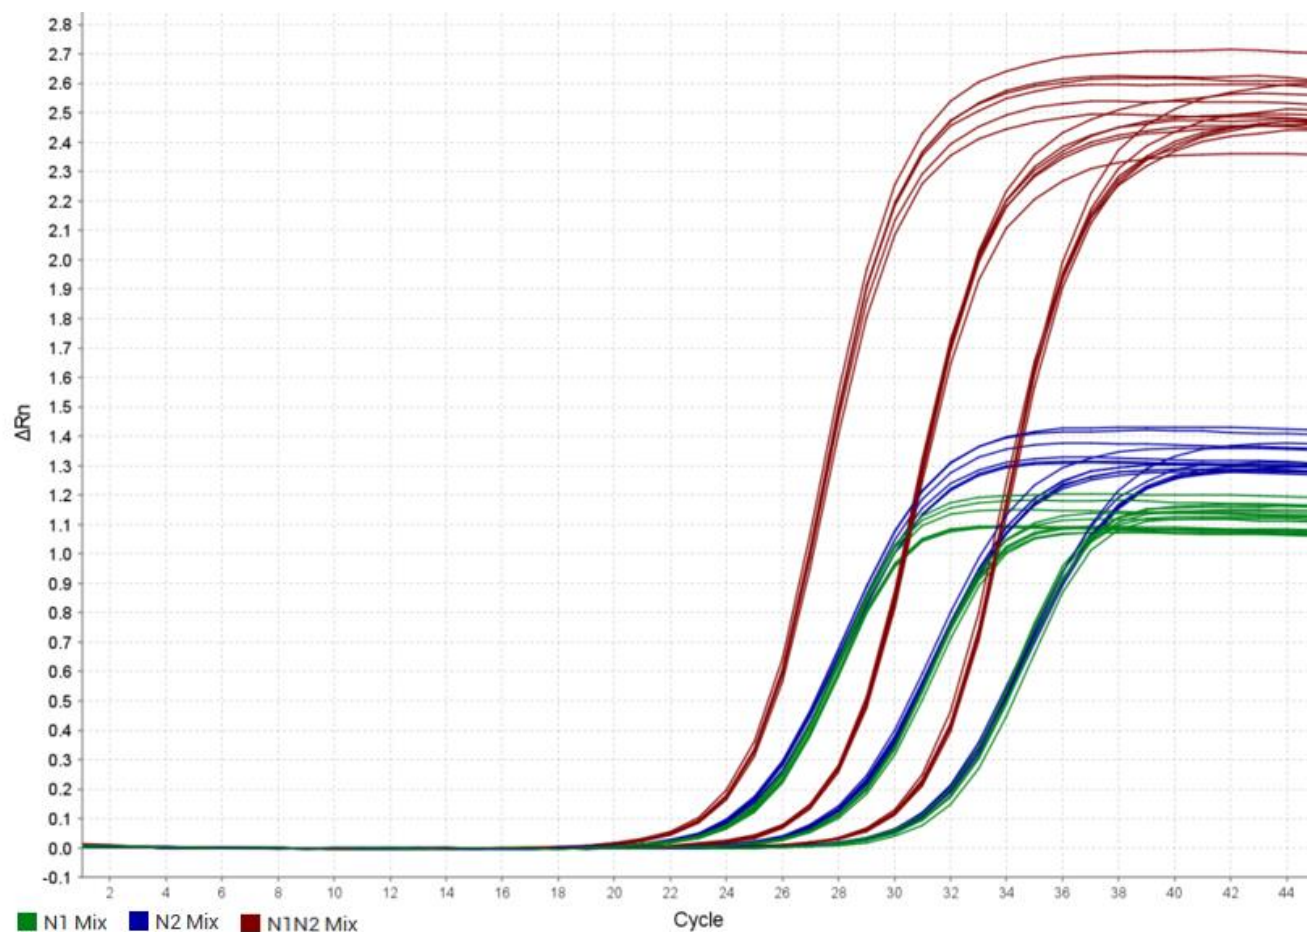

Figure 2: Standard curves produced using N1 Mix (green), N2 Mix (blue), and N1N2 Mix (black) to detect single-stranded RNA containing the N gene at 100, 1,000, and 10,000 copies per reaction.

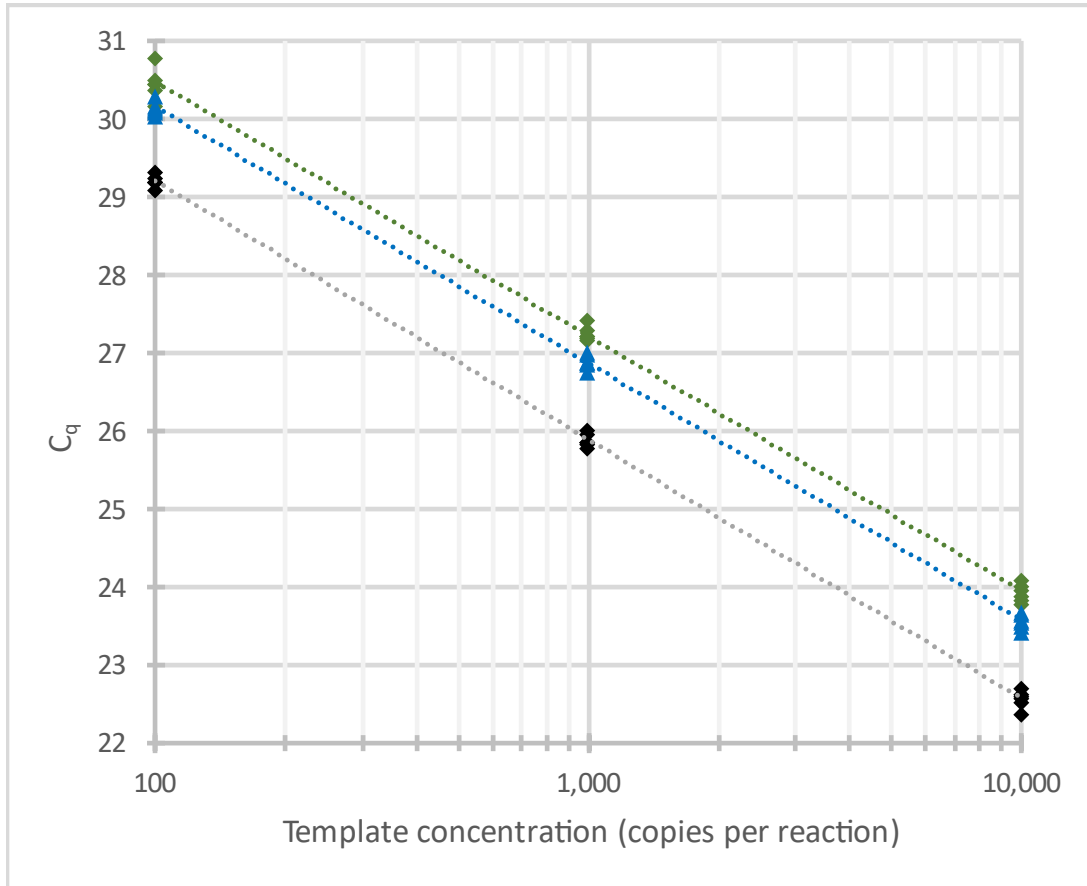

Figure 3: Impact of mutations from three different Omicron lineages on the individual N1 reaction and the single-channel N1N2 multiplex reaction. All reactions were performed using N1N2 Mix (Table 1). Reaction signal varied according to the presence of N1 and N2 template. Separate reactions were performed in which each N1 template sequence was tested in the presence and absence of wild-type N2 template. When only N1 template was provided, fluorescent signal was produced solely from N1 amplification and detection corresponding to individual N1 detection. When both N1 and N2 template were provided, fluorescent signal was produced from simultaneous amplification and detection of N1 and N2 corresponding to the N1N2 single-channel multiplex reaction.

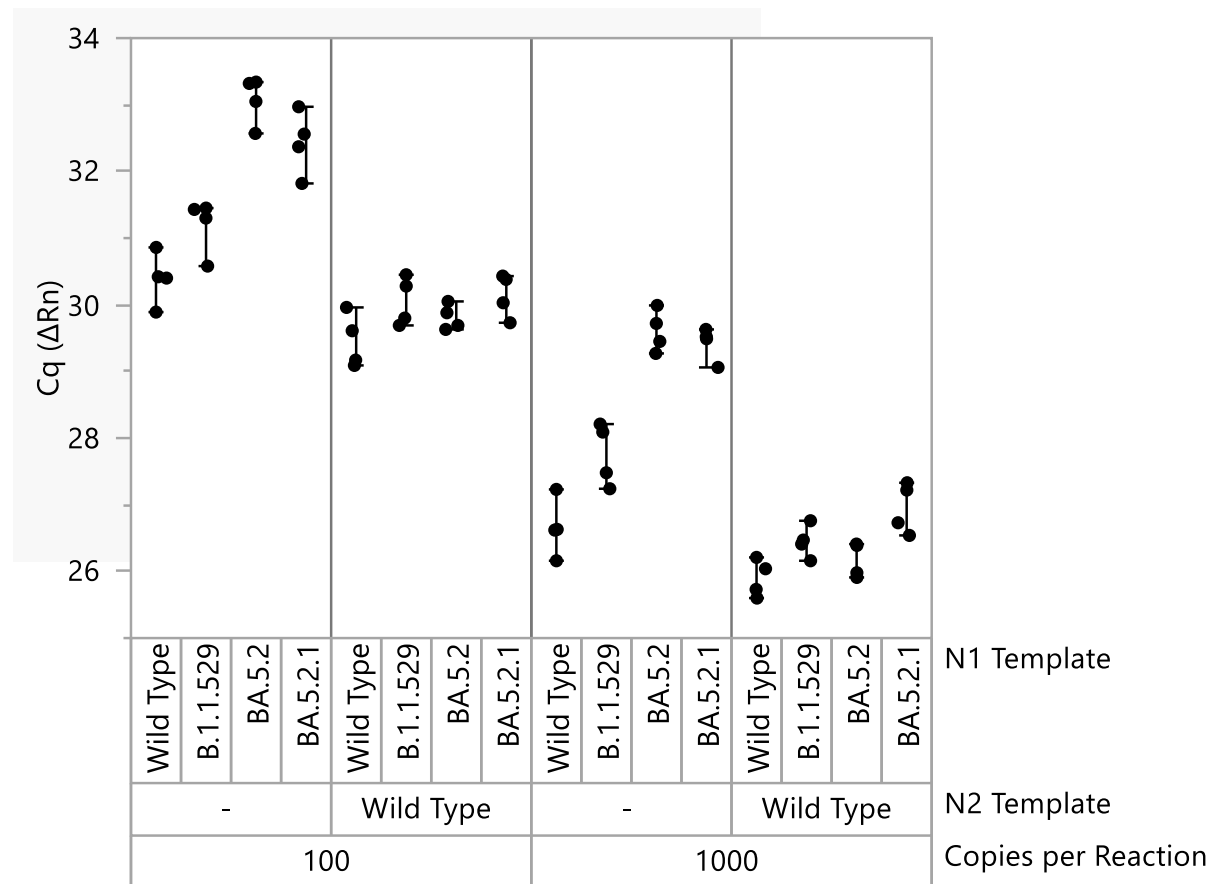

Source: https://www.medrxiv.org/content/10.1101/2023.04.27.23289205v1.full.pdf
